# Supplementary material
Source: PubMed Central journal article supplement (PMC4318121)
Supplement: NIHMS651569-supplement-Supplementary_Table_1.pdf [file NIHMS651569-supplement-Supplementary_Table_1.pdf]

**SUPPLEMENTAL MATERIAL**

**Supplemental Table 1. Pharmacogenomic Studies in Pediatric Cardiac Transplantation**

| Authors                         | Drug       | N* | Patient Base                      | Outcome(s)                                                                          | Gene(s)                                               | Variant(s)                                                    | Findings                                                                                                                                                                                                                                                                            |
|---------------------------------|------------|----|-----------------------------------|-------------------------------------------------------------------------------------|-------------------------------------------------------|---------------------------------------------------------------|-------------------------------------------------------------------------------------------------------------------------------------------------------------------------------------------------------------------------------------------------------------------------------------|
| Zheng, 2002 <sup>1</sup>        | Tacrolimus | 69 | Children's Hospital of Pittsburgh | Steroid dependency at 1 year<br><br>Drug concentration                              | <i>ABCB1</i>                                          | rs1045642<br>rs2032582                                        | rs1045642 CC homozygotes with increased steroid dependency (67% vs. 38%, p=0.04)<br><br>No associations to tacrolimus concentration                                                                                                                                                 |
| Zheng, 2003 <sup>2</sup>        | Tacrolimus | 65 | Children's Hospital of Pittsburgh | Dose adjusted drug concentration                                                    | <i>ABCB1</i><br><br><i>CYP3A5</i>                     | rs1045642<br>rs2032582<br><br>rs776746                        | rs1045642 CC homozygotes with lower drug level at 6m (p=0.028), 12m (p=0.033)<br><br>rs2032582 GG homozygotes with lower drug level at 6m (p=0.017), 12m (p=0.014)<br><br>Compared to <i>CYP3A5</i> *3/*3, *1/*3 with lower Tacrol level at 3m (p=0.014), 6m (p=0.017), 12m (0.015) |
| Zheng, 2004 <sup>3</sup>        | Tacrolimus | 70 | Children's Hospital of Pittsburgh | Steroid dependency at 1 year<br><br>Drug concentration                              | <i>ABCB1</i><br><br><i>CYP3A5</i>                     | rs1045642<br>rs2032582<br><br>rs776746                        | rs1045642 CC homozygotes with increased steroid dependency (67% vs. 38%, p=0.04, AOR 0.249 [0.063-0.983])<br><br>No difference in drug concentrations<br><br>No associations                                                                                                        |
| Gijsen et al, 2011 <sup>4</sup> | Tacrolimus | 39 | Toronto, Ontario, Canada          | Dose per kg/12 hours<br><br>Trough concentration<br><br>Dose adjusted concentration | <i>ABCB1</i><br><br><i>CYP3A5</i>                     | rs1045642<br>rs1128503<br>rs2032582<br><br>rs776746           | No associations<br><br>Compared to <i>CYP3A5</i> *3/*3, *1 carriers with higher dose (0.14 vs 0.06 mg/kg/12 hours, p=0.001), lower trough (7.7 vs 9.8 ng/ml, p=0.032), and lower dose adjusted concentration (45.34 vs 177.78 ng/ml per mg/kg/12 hours, p=0.001)                    |
| Gijsen et al, 2013 <sup>5</sup> | Tacrolimus | 60 | Toronto, Ontario, Canada          | Dose to reach target concentration                                                  | <i>CYP3A4</i><br><br><i>CYP3A5</i> /<br><i>CYP3A5</i> | rs35599367<br><br>rs35599367<br>rs776746                      | <i>CYP3A4</i> *22 carriers with 30% lower doses (p=0.016)<br><br>Poor <i>CYP3A</i> metabolizers with 17% lower doses than intermediate (p=0.023), and 48% less than extensive metabolizers (p<0.0001)                                                                               |
| Ohmann, 2010 <sup>6</sup>       | MMF/MPA    | 59 | Children's Hospital of Pittsburgh | Drug discontinuation<br><br>GI intolerance<br><br>Bone marrow toxicity              | <i>IMPDH1</i>                                         | rs2288553<br>rs2288549<br>rs2278293<br>rs2278294<br>rs2220875 | rs2278294 A and rs2228075 A carriers with more GI intolerance (p=0.029 and p=0.002; AORs 0.28 [0.09-0.90], 0.16 [0.05-0.55], respectively)                                                                                                                                          |

|                             |         |     |                                                        |                                                                         |               |                                                               |                                                                                                                                                                                         |
|-----------------------------|---------|-----|--------------------------------------------------------|-------------------------------------------------------------------------|---------------|---------------------------------------------------------------|-----------------------------------------------------------------------------------------------------------------------------------------------------------------------------------------|
|                             |         |     |                                                        |                                                                         | <i>IMPDH2</i> | rs11706052                                                    | rs11706052 G carriers with increased bone marrow toxicity (p=0.046, AOR 0.26, [0.02-1.19])                                                                                              |
|                             |         |     |                                                        |                                                                         | <i>ABCC2</i>  | rs717620                                                      | rs717620 A carriers with higher rate of discontinuation of MMF/MPA due to any cause (p=0.021, AOR 0.22, 95%CI 0.06-0.77) and with more GI intolerance (p<0.001, AOR 0.025 [0.002-0.27]) |
| Ohmann, 2010 <sup>7</sup>   | MMF/MPA | 59  | Children's Hospital of Pittsburgh                      | Gastrointestinal intolerance                                            | <i>IMPDH1</i> | rs2288553<br>rs2288549<br>rs2278293<br>rs2278294<br>rs2228075 | <i>IMPDH1</i> haplotype B (TCTTT) associated with GI intolerance (59% in carriers vs 22% in non-carriers, p=0.005)                                                                      |
| Burckart, 2014 <sup>8</sup> | MMF/MPA | 290 | Pediatric Heart Transplantation Study (6 institutions) | Rejection with hemodynamic compromise<br><br>Graft failure<br><br>Death | <i>ABCC2</i>  | rs717620                                                      | rs717620 GG homozygotes with increased rejection with hemodynamic compromise and late rejection with hemodynamic compromise (p<0.05, hazard ratios: 1.80 and 4.57, respectively)        |

\*N = Number included in study. Number with genotype and phenotype data available for each outcome may be slightly lower  
AOR – Adjusted Odds Ratio; MMF – mycophenolate mofetil; MPA – mycophenolic acid

## Supplemental References

1. Zheng H, Webber S, Zeevi A, Schuetz E, Zhang J, Lamba J, Bowman P, Burckart GJ. The MDR1 polymorphisms at exons 21 and 26 predict steroid weaning in pediatric heart transplant patients. *Hum Immunol.* 2002;63:765–770.
2. Zheng H, Webber S, Zeevi A, Schuetz E, Zhang J, Bowman P, Boyle G, Law Y, Miller S, Lamba J, Burckart GJ. Tacrolimus dosing in pediatric heart transplant patients is related to CYP3A5 and MDR1 gene polymorphisms. *Am J Transplant.* 2003;3:477–483.
3. Zheng HX, Webber SA, Zeevi A, Schuetz E, Zhang J, Lamba J, Boyle GJ, Wilson JW, Burckart GJ. The impact of pharmacogenomic factors on steroid dependency in pediatric heart transplant patients using logistic regression analysis. *Pediatr Transplant.* 2004;8:551–557.
4. Gijzen V, Mital S, van Schaik RH, Soldin OP, Soldin SJ, van der Heiden IP, Nulman I, Koren G, de Wildt SN. Age and CYP3A5 genotype affect tacrolimus dosing requirements after transplant in pediatric heart recipients. *J Heart Lung Transplant.* 2011;30:1352–1359.
5. Gijzen VM, van Schaik RH, Elens L, Soldin OP, Soldin SJ, Koren G, de Wildt SN. CYP3A4\*22 and CYP3A combined genotypes both correlate with tacrolimus disposition in pediatric heart transplant recipients. *Pharmacogenomics.* 2013;14:1027–1036.
6. Ohmann EL, Burckart GJ, Brooks MM, Chen Y, Pravica V, Girnita DM, Zeevi A, Webber SA. Genetic polymorphisms influence mycophenolate mofetil-related adverse events in pediatric heart transplant patients. *J Heart Lung Transplant.* 2010;29:509–516.

7. Ohmann EL, Burckart GJ, Chen Y, Pravica V, Brooks MM, Zeevi A, Webber SA. Inosine 5'-monophosphate dehydrogenase 1 haplotypes and association with mycophenolate mofetil gastrointestinal intolerance in pediatric heart transplant patients. *Pediatr Transplant*. 2010;14:891–895.
8. Burckart GJ, Figg WD 2nd, Brooks MM, Green DJ, Troutman SM, Ferrell R, Chinnock R, Canter C, Addonizio L, Bernstein D, Kirklin JK, Naftel D, Price DK, Sissung TM, Girnita DM, Zeevi A, Webber SA. Multi-institutional Study of Outcomes After Pediatric Heart Transplantation: Candidate Gene Polymorphism Analysis of ABCC2. *J Pediatr Pharmacol Ther*. 2014;19:16–24.
